# Supplementary material for: The technical reliability and biotemporal stability of cerebrospinal fluid biomarkers for profiling multiple pathophysiologies in Alzheimer’s disease
Source: PubMed Central journal article supplement (PMC5837100; doi:10.1371/journal.pone.0193707), 2018-03-05
Supplement: pone.0193707.s002.pdf [file pone.0193707.s002.pdf]

**S2 Figure. Promising candidates that exhibited good technical replicability and biotemporal stability.**

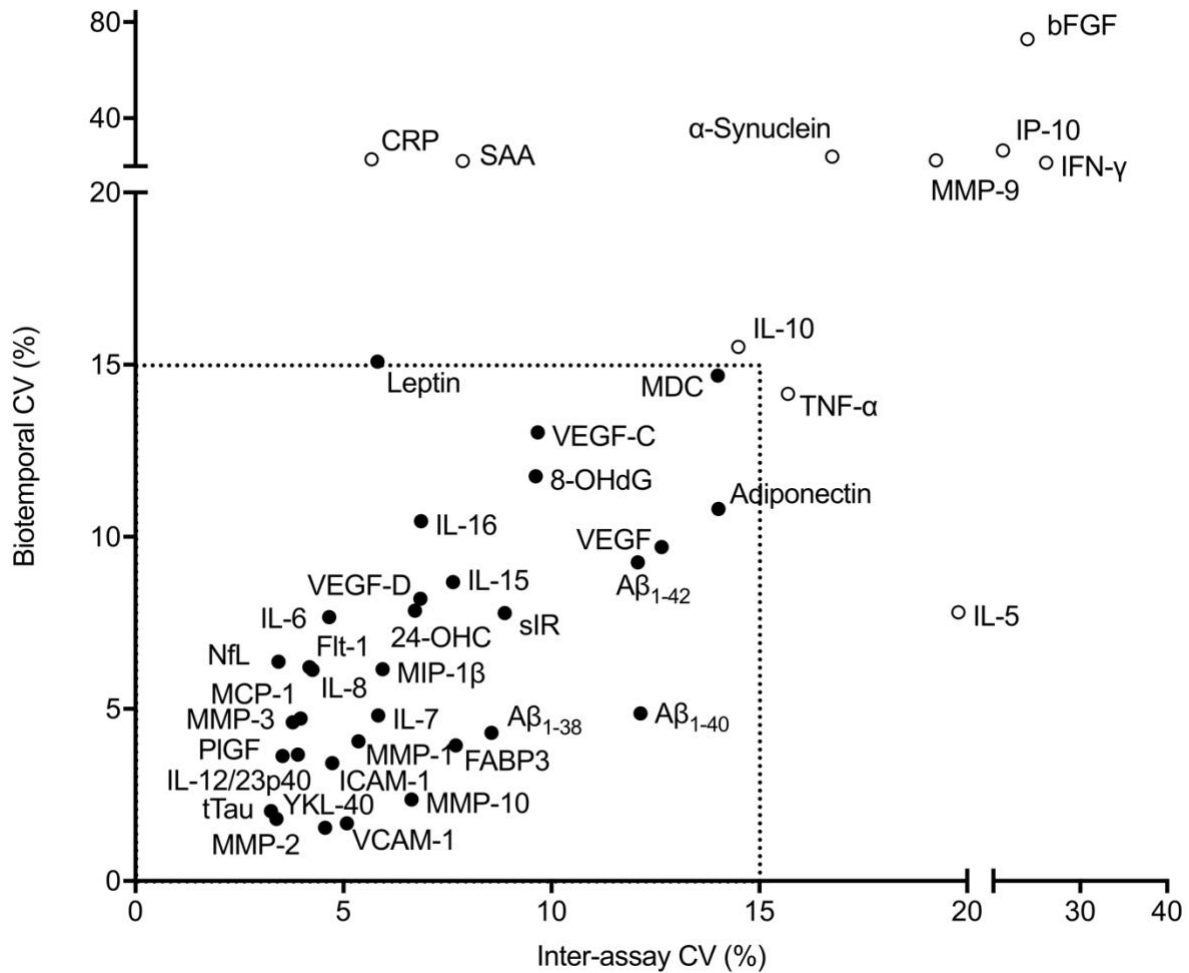

Fit-for-purpose criteria set at 15% for both inter-assay replicability and biotemporal variation. Of the 42 candidates that passed assay sensitivity and technical precision measures, 32 analytes were identified as promising candidates with acceptable inter-assay replicability and biotemporal stability (indicated with filled-in data points). Abbreviations: CV, coefficient of variation.
